# Supplementary material
Source: PubMed Central journal article supplement (PMC1367073)
Supplement: biophysj_105.061010_1.pdf [file biophysj_105.061010_1.pdf]

## SUPPLEMENTAL MATERIALS

It has been shown that, for Thermomicroscopes (Sunnyvale, CA) cantilevers, the inclination and deflection at the cantilever tip are proportional to each other, i.e.,  $z(L) = \alpha L [dz/dx]_{x=L}$ , which allows the definition of virtual deflection, i.e.,  $z^*(L,t) \equiv \alpha L [\partial z / \partial x]_{x=L}$  (Wu et al., 2005). In addition, mean square virtual deflections to the mean square real deflections are proportional to each other, and the proportionality constant is a linear function of the ratio of the molecular spring constant to the cantilever spring constant:

$$\langle z^{*2} \rangle / \langle z^2 \rangle = a(k/k_c) + b \quad (\text{S1})$$

The constants  $\alpha$ ,  $a$ , and  $b$  are listed in Table 1 for Thermomicroscopes cantilevers.

Table 1

| Cantilever | A        | B           | C        | D        | E        | F        | Theoretical |
|------------|----------|-------------|----------|----------|----------|----------|-------------|
| Shape      | V-shaped | Rectangular | V-shaped | V-shaped | V-shaped | V-shaped | Rectangular |
| $\alpha$   | 0.670137 | 0.665266    | 0.685908 | 0.661468 | 0.652268 | 0.584174 | 2/3         |
| $a$        | 0.3943   | 0.3024      | 0.3879   | 0.4068   | 0.4188   | 0.4315   | 1/3         |
| $b$        | 1.3072   | 1.2969      | 1.3831   | 1.3738   | 1.3834   | 1.3349   | 4/3         |

It has also shown that, due to the bandwidth limitations, errors will arise if one directly uses Eq. S1 in the equipartition theorem [i.e.,  $\frac{1}{2}(k_c + k) = \frac{1}{2}k_B T$ ] to evaluate the spring constants of the cantilever and the molecular linker according to the following (Wu et al., 2005).

$$k = k_c \frac{b k_B T - k_c \langle z^{*2} \rangle}{k_c \langle z^{*2} \rangle - a k_B T}. \quad (\text{S2})$$

Depending the number (N) of vibration modes measurable from experiment, the following approximation will substantially reduce the errors.

$$k \approx c_N k_c \frac{b_N k_B T - k_c \sum_{n=1}^N \langle z_n^{*2} \rangle}{k_c \sum_{n=1}^N \langle z_n^{*2} \rangle + a_N k_B T}, \quad (\text{S3})$$

The coefficients  $a_N$ ,  $b_N$ , and  $c_N$  sing for  $N = 1, 2$ , and  $3$  are listed in Table 2 for the indicated Thermomicroscopes cantilevers.

Table 2

Cantilever B

|       | $N = 1$ | $N = 2$ | $N = 3$ |
|-------|---------|---------|---------|
| $a_N$ | 0.1445  | -0.0757 | -0.1589 |
| $b_N$ | 0.8170  | 1.0694  | 1.1556  |
| $c_N$ | 0.9583  | 0.9813  | 0.9861  |

Cantilever C

|       | $N = 1$ | $N = 2$ | $N = 3$ |
|-------|---------|---------|---------|
| $a_N$ | 0.1842  | 0.0045  | -0.0991 |
| $b_N$ | 0.6920  | 0.9727  | 1.0902  |
| $c_N$ | 0.8697  | 0.9694  | 0.9838  |

Cantilever D

|       | $N = 1$ | $N = 2$ | $N = 3$ |
|-------|---------|---------|---------|
| $a_N$ | 0.2067  | 0.0460  | -0.0648 |
| $b_N$ | 0.6946  | 0.9912  | 1.1226  |
| $c_N$ | 0.8452  | 0.9655  | 0.9814  |

Cantilever E

|       | $N = 1$ | $N = 2$ | $N = 3$ |
|-------|---------|---------|---------|
| $a_N$ | 0.2104  | 0.0626  | -0.0487 |
| $b_N$ | 0.6796  | 0.9915  | 1.1307  |
| $c_N$ | 0.8098  | 0.9517  | 0.9750  |
